# Supplementary material for: Disintegration of wheat aleurone structure has an impact on the bioavailability of phenolic compounds and other phytochemicals as evidenced by altered urinary metabolite profile of diet-induced obese mice
Source: PubMed Central journal article supplement (PMC3891979; doi:10.1186/1743-7075-11-1), 2014-01-02
Supplement: 1743-7075-11-1-S1.pdf [file 1743-7075-11-1-S1.pdf]

Nutrition&Metabolism

Electronic Supplementary Material

Disintegration of wheat aleurone structure has an impact on the bioavailability of phenolic compounds and other phytochemicals as evidenced by altered urinary metabolite profile of diet-induced obese mice

Jenna Pekkinen, Natalia Rosa, Otto Savolainen, Pekka Keski-Rahkonen, Hannu Mykkänen, Kaisa Poutanen, Valérie Micard, Kati Hanhineva

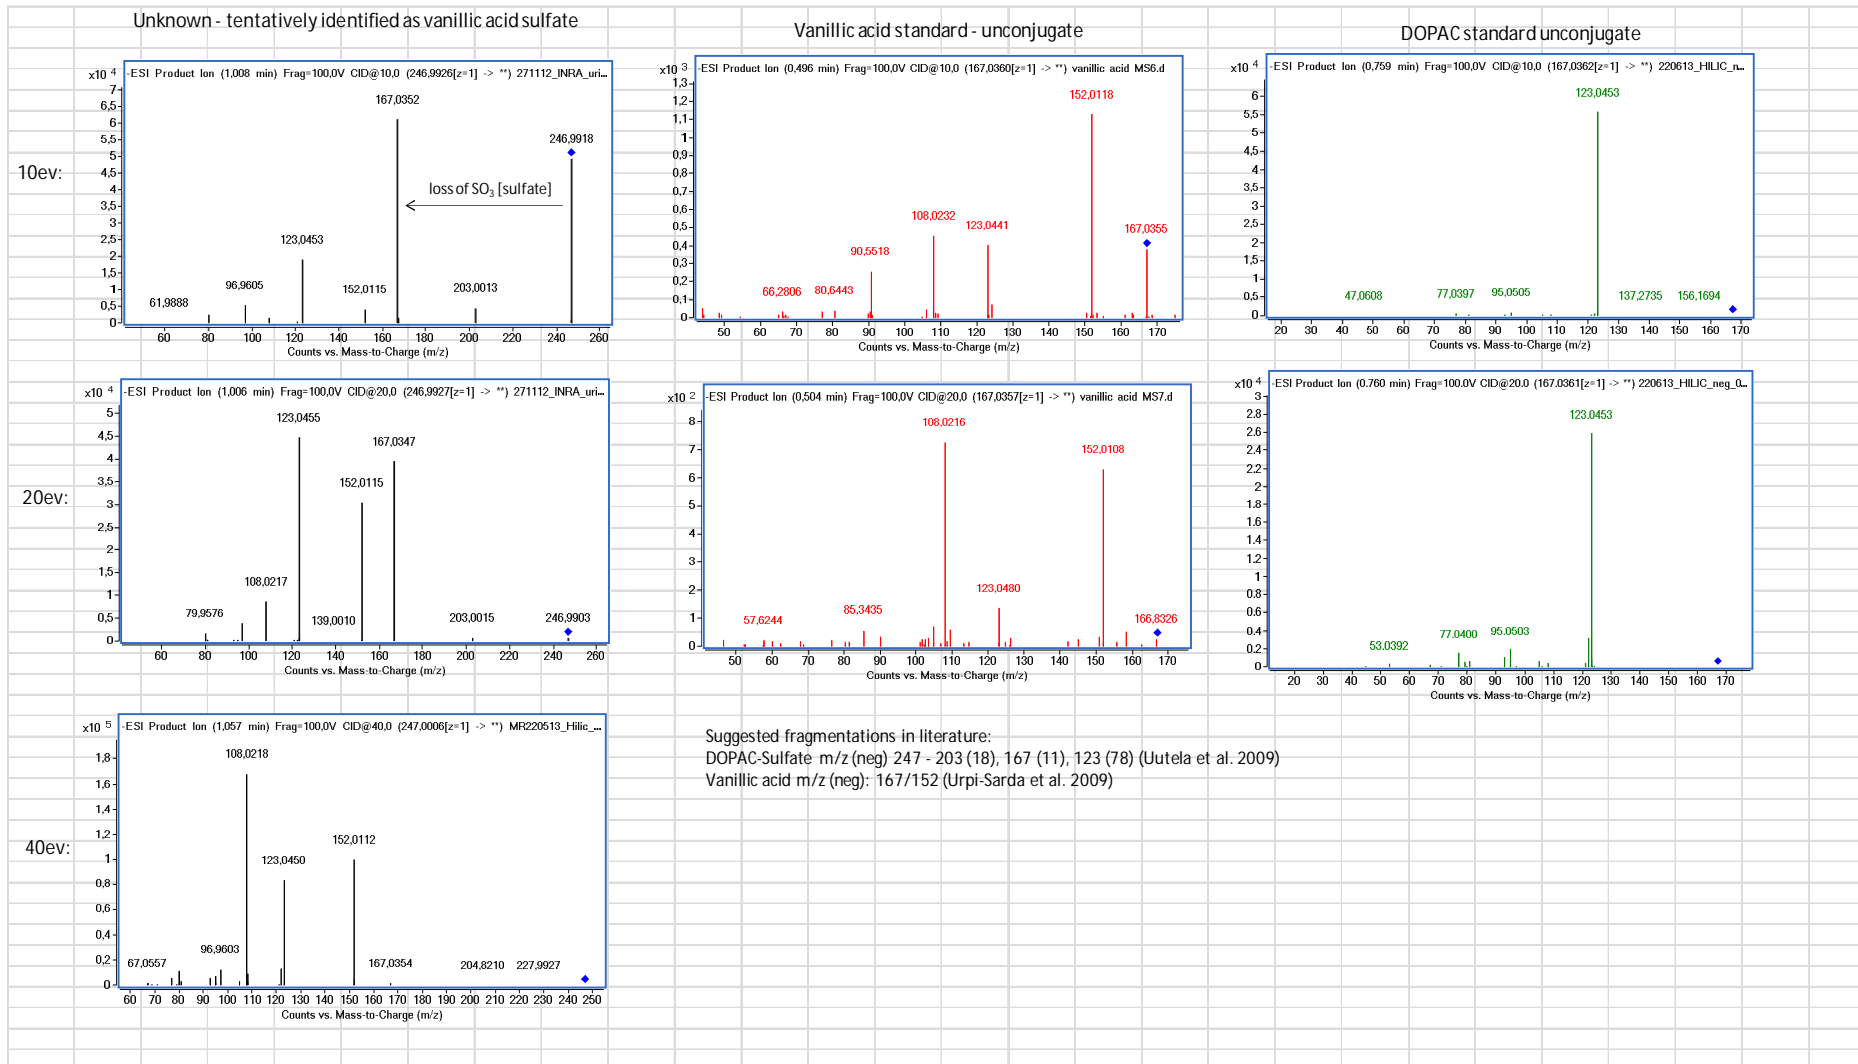

Figure S1. Shows the MS/MS spectra for tentatively identified vanillic acid sulfate m/z 246.9918 with retention time 0.99 min. The identification was based on comparing the MS/MS spectra with the MS/MS spectra of standard compounds vanillic acid and DOPAC (both unconjugated), and to the suggested fragments for DOPAC sulfate and vanillic acid found in the existing literature.

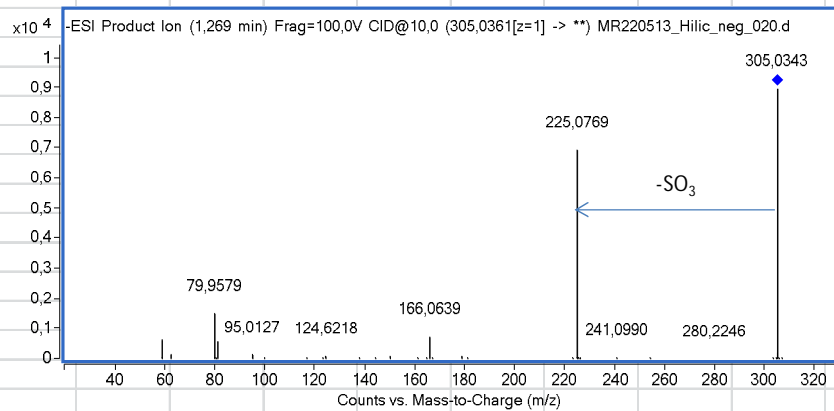

- 1) Molecular formula: C<sub>11</sub>H<sub>14</sub>O<sub>8</sub>S, mfg-score 98.36, diff 0.63ppm
- 2) the MS/MS fragmentation created fragments 225.0783 [M-SO<sub>3</sub>-H]<sup>-</sup>, 206.9972 [M-SO<sub>3</sub>-OH-H]<sup>-</sup>, and 166.0639 [2H<sup>+</sup> more than one of the suggested fragments of sinapic acid (MID 45738)]

The metabolite is tentatively dihydrosinapic acid sulfate.

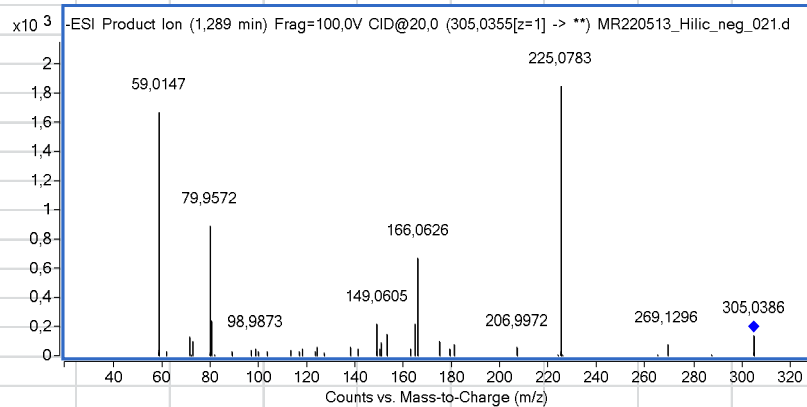

Figure S2. The fragmentation pattern of tentatively identified sinapic acid sulfate with m/z 305.0386. The identification is based on matching molecular formula and the MS/MS fragmentation pattern.
